# Supplementary material for: Limited contribution of ancient methane to surface waters of the U.S. Beaufort Sea shelf
Source: PubMed Central journal article supplement — Sci Adv. 2018 Jan 17;4(1):eaao4842. doi: 10.1126/sciadv.aao4842 (PMC5771695; doi:10.1126/sciadv.aao4842), 2018-01-17
Supplement: aao4842_SM.pdf [file aao4842_SM.pdf]

Supplementary Materials for  
**Limited contribution of ancient methane to surface waters of the U.S.  
Beaufort Sea shelf**

Katy J. Sparrow, John D. Kessler, John R. Southon, Fenix Garcia-Tigreros, Kathryn M. Schreiner,  
Carolyn D. Ruppel, John B. Miller, Scott J. Lehman, Xiaomei Xu

Published 17 January 2018, *Sci. Adv.* **4**, eaao4842 (2018)  
DOI: 10.1126/sciadv.aao4842

**This PDF file includes:**

- fig. S1. Dissolved CH<sub>4</sub> concentration and isotopic data plotted by station depth.
- table S1. Dissolved <sup>14</sup>C-CH<sub>4</sub>, δ<sup>13</sup>C-CH<sub>4</sub>, and [CH<sub>4</sub>] data with relevant sample information.

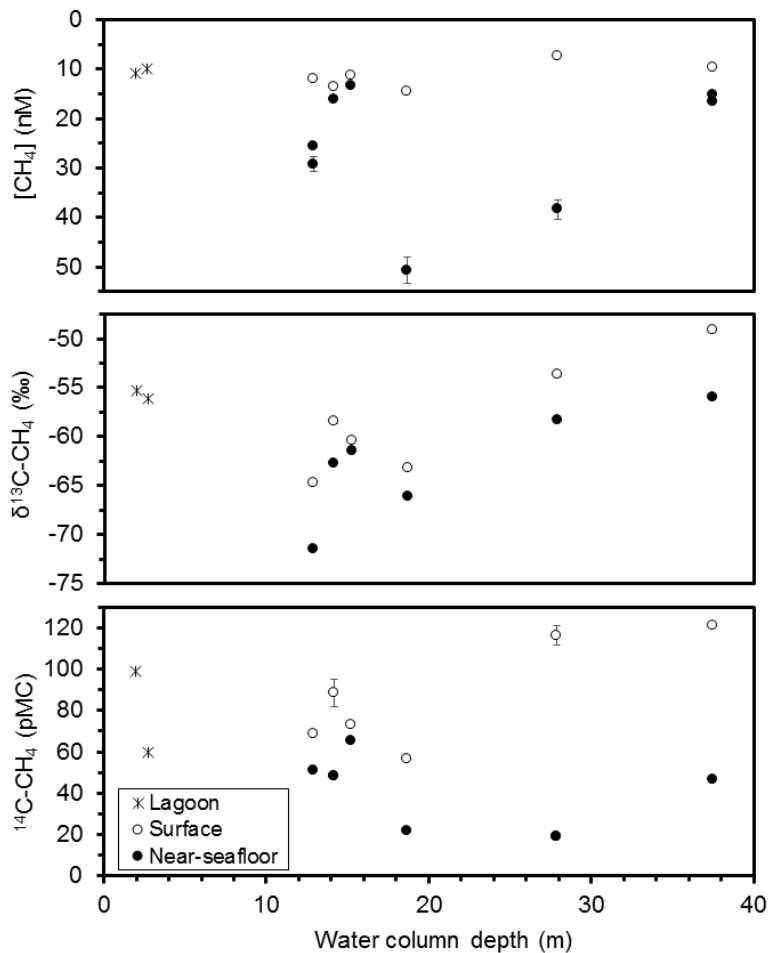

**fig. S1. Dissolved CH<sub>4</sub> concentration and isotopic data plotted by station depth.** Data for [CH<sub>4</sub>], δ<sup>13</sup>C-CH<sub>4</sub>, and <sup>14</sup>C-CH<sub>4</sub> are shown for lagoon samples (asterisks), surface samples (white circles), and near-seafloor samples (black circles). Note that the y-axis is reversed for [CH<sub>4</sub>] data. Error bars that are not visible are smaller than the markers. [CH<sub>4</sub>] uncertainty is 5.2% of the measurement (39). Uncertainty for δ<sup>13</sup>C-CH<sub>4</sub> data reflects measurement uncertainty. Uncertainty for <sup>14</sup>C-CH<sub>4</sub> data incorporates the collection, preparation, and measurement uncertainties (20).

**table S1. Dissolved  $^{14}\text{C-CH}_4$ ,  $\delta^{13}\text{C-CH}_4$ , and  $[\text{CH}_4]$  data with relevant sample information.**

| Station | Water depth (m) | Distance offshore (km) | Sample type   | Ancient C-sourced $\text{CH}_4$ fraction, $f_s$ | Atmospheric-sourced $\text{CH}_4$ fraction, $f_a$ | <i>In situ</i> produced $\text{CH}_4$ fraction, $f_i$ |
|---------|-----------------|------------------------|---------------|-------------------------------------------------|---------------------------------------------------|-------------------------------------------------------|
| 1       | 2               | 3                      | lagoon        | $0.18 \pm 0.06$                                 | $0.47 \pm 0.18$                                   | $0.35 \pm 0.25$                                       |
| 2       | 3               | 2                      | lagoon        | $0.50 \pm 0.04$                                 | $0.23 \pm 0.12$                                   | $0.27 \pm 0.17$                                       |
| 3       | 14              | 12                     | surface       | $0.26 \pm 0.06$                                 | $0.37 \pm 0.18$                                   | $0.37 \pm 0.24$                                       |
|         |                 |                        | near-seafloor | $0.60 \pm 0.04$                                 | $0.18 \pm 0.10$                                   | $0.22 \pm 0.13$                                       |
| 4       | 15              | 10                     | surface       | $0.39 \pm 0.05$                                 | $0.29 \pm 0.15$                                   | $0.33 \pm 0.20$                                       |
|         |                 |                        | near-seafloor | $0.45 \pm 0.05$                                 | $0.25 \pm 0.14$                                   | $0.30 \pm 0.18$                                       |
| 5       | 13              | 18                     | surface       | $0.42 \pm 0.05$                                 | $0.27 \pm 0.14$                                   | $0.31 \pm 0.19$                                       |
|         |                 |                        | near-seafloor | $0.58 \pm 0.04$                                 | $0.19 \pm 0.10$                                   | $0.23 \pm 0.14$                                       |
| 6       | 19              | 27                     | surface       | $0.53 \pm 0.04$                                 | $0.21 \pm 0.12$                                   | $0.26 \pm 0.16$                                       |
|         |                 |                        | near-seafloor | $0.83 \pm 0.02$                                 | $0.07 \pm 0.04$                                   | $0.10 \pm 0.06$                                       |
| 7       | 28              | 48                     | surface       | $0.10 \pm 0.03$                                 | $0.72 \pm 0.10$                                   | $0.18 \pm 0.13$                                       |
|         |                 |                        | near-seafloor | $0.86 \pm 0.02$                                 | $0.06 \pm 0.04$                                   | $0.08 \pm 0.05$                                       |
| 8       | 38              | 69                     | surface       | $0.07 \pm 0.03$                                 | $0.79 \pm 0.07$                                   | $0.14 \pm 0.10$                                       |
|         |                 |                        | near-seafloor | $0.61 \pm 0.03$                                 | $0.17 \pm 0.10$                                   | $0.22 \pm 0.13$                                       |

$^{14}\text{C-CH}_4$  content and conventional  $^{14}\text{C}$  age uncertainty incorporates the collection, preparation, and measurement uncertainties (20).  $\delta^{13}\text{C-CH}_4$  uncertainty is the measurement uncertainty associated with IRMS or CRDS ( $\dagger$ ).  $[\text{CH}_4]$  uncertainty is 5.2% of the measurement (39). Asterisks (\*) indicate  $^{14}\text{C-CH}_4$  and  $\delta^{13}\text{C-CH}_4$  samples that are preparation duplicates that were made after optimizing the collection stage of the preparation technique (20). Section signs (§) indicate duplicate  $[\text{CH}_4]$  samples. Double daggers (§§) indicate a  $[\text{CH}_4]$  sample that was analyzed in a single run on the GC-FID rather than in duplicate runs. The degree of  $\text{CH}_4$  saturation, where 100% represents full equilibrium with the atmosphere, is reported only for surface water samples.
